# Supplementary material for: Reranking candidate gene models with cross-species comparison for improved gene prediction
Source: Springer Nature journal article supplement (doi:10.1186/1471-2105-9-433), 2008-10-14

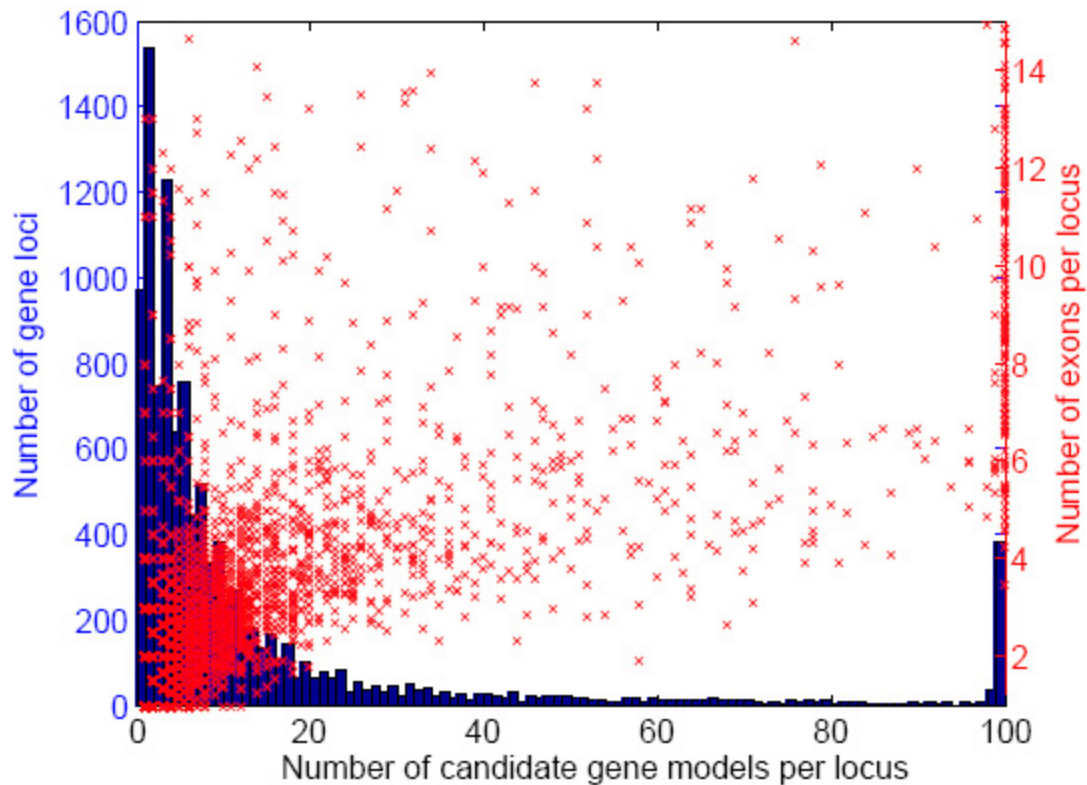

Supplement: 12859_2008_2418_MOESM1_ESM.pdf [file 12859_2008_2418_MOESM1_ESM.pdf]
