# Supplementary material for: Reranking candidate gene models with cross-species comparison for improved gene prediction
Source: Springer Nature journal article supplement (doi:10.1186/1471-2105-9-433), 2008-10-14
Supplement: 12859_2008_2418_MOESM2_ESM.pdf [file 12859_2008_2418_MOESM2_ESM.pdf]

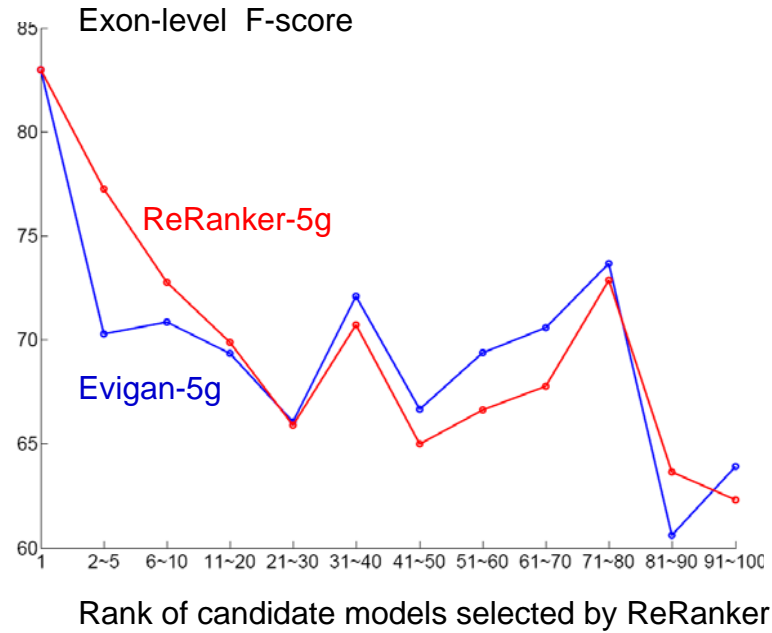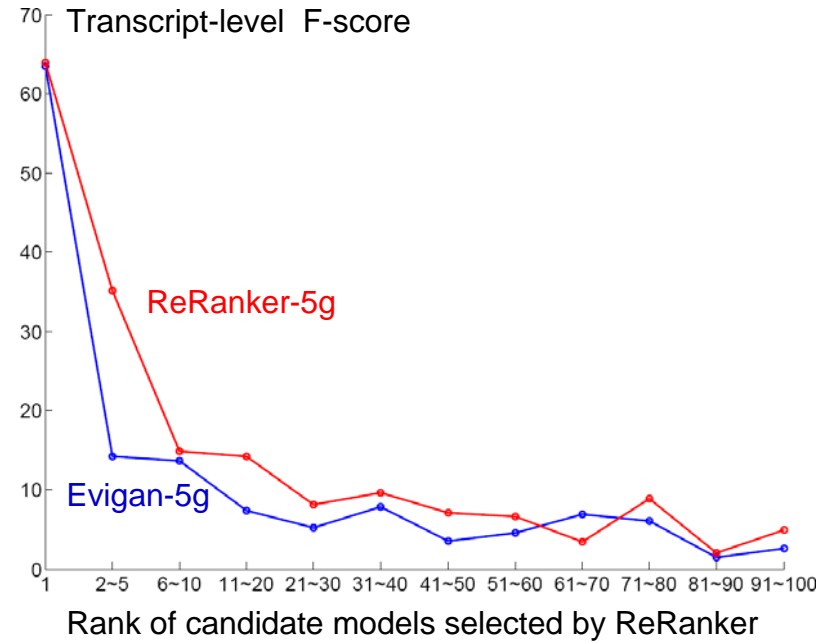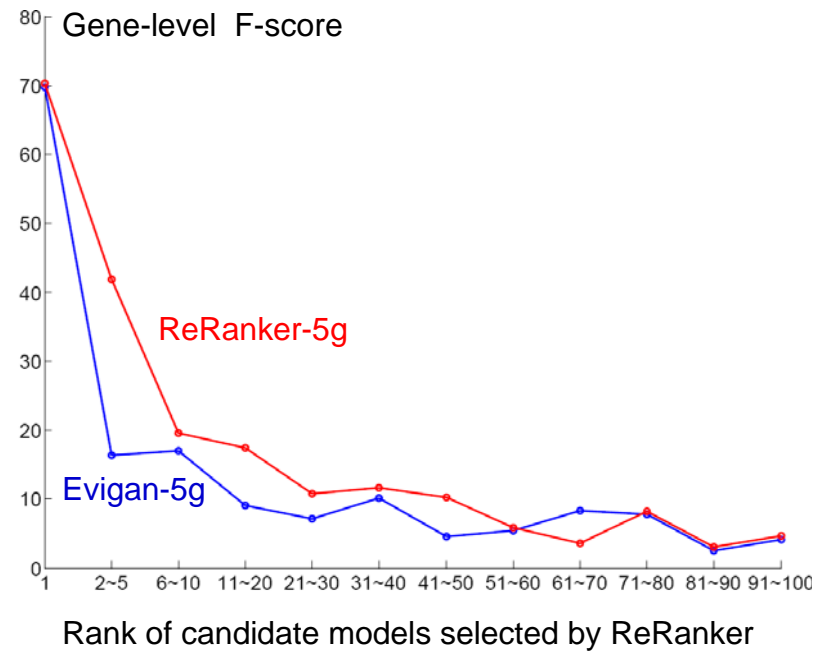

| rank  | #loci | rank   | #loci |
|-------|-------|--------|-------|
| 1     | 6031  | 41~50  | 79    |
| 2~5   | 820   | 51~60  | 55    |
| 6~10  | 228   | 61~70  | 47    |
| 11~20 | 210   | 71~80  | 32    |
| 21~30 | 131   | 81~90  | 28    |
| 30~40 | 82    | 91~100 | 34    |
